# Supplementary material for: A Comparative Perspective on Functionally-Related, Intracellular Calcium Channels: The Insect Ryanodine and Inositol 1,4,5-Trisphosphate Receptors
Source: MDPI journal article supplement (doi:10.3390/biom11071031), 2021-07-15
Supplement: s1 [file s1]

**Supplementary Table 1.** Proteins used in the phylogenetic analysis and alignments in the current review.

| <b>Ryanodine receptor (RyR)</b>                                                       | <b>Inositol 1,4,5-trisphosphate receptor (IP<sub>3</sub>R)</b>                                         |
|---------------------------------------------------------------------------------------|--------------------------------------------------------------------------------------------------------|
| <b>Common Name, Species Name (Order: Family) (Protein Accession no)</b>               | <b>Common Name, Species Name (Order: Family) (Protein Accession no)</b>                                |
| RyR1 Human <i>Homo sapiens</i> (Primates: Hominidae) (XP_006723380.1)                 | IP <sub>3</sub> R1 Human <i>Homo sapiens</i> (Primates: Hominidae) (NP_001093422.2)                    |
| RyR2 Human <i>Homo sapiens</i> (Primates: Hominidae) (XP_006711865.1)                 | IP <sub>3</sub> R2 Human <i>Homo sapiens</i> (Primates: Hominidae) (XP_016874755.1)                    |
| RyR3 Human <i>Homo sapiens</i> (Primates: Hominidae) (NP_001027.3)                    | IP <sub>3</sub> R3 Human <i>Homo sapiens</i> (Primates: Hominidae) (NP_002215.2)                       |
| RyR1 Mouse <i>Mus musculus</i> (Rodentia: Murida) (XP_036008711.1)                    | IP <sub>3</sub> R1 Mouse <i>Mus musculus</i> (Rodentia: Murida) (XP_006505700.1)                       |
| RyR2 Mouse <i>Mus musculus</i> (Rodentia: Murida) (XP_017170944.1)                    | IP <sub>3</sub> R2 Mouse <i>Mus musculus</i> (Rodentia: Murida) (NP_034716.1)                          |
| RyR3 Mouse <i>Mus musculus</i> (Rodentia: Murida) (XP_017172189.1)                    | IP <sub>3</sub> R3 Mouse <i>Mus musculus</i> (Rodentia: Murida) (NP_542120.2)                          |
| RyR1 Bear <i>Ursus arctos horribilis</i> (Carnivora: Ursidae) (XP_026337550.1)        | IP <sub>3</sub> R1 Bear <i>Ursus arctos horribilis</i> (Carnivora: Ursidae) (XP_026357051.1)           |
| RyR2 Bear <i>Ursus arctos horribilis</i> (Carnivora: Ursidae) (XP_026359820.1)        | IP <sub>3</sub> R2 Bear <i>Ursus arctos horribilis</i> (Carnivora: Ursidae) (XP_026358015.1)           |
| RyR3 Bear <i>Ursus arctos horribilis</i> (Carnivora: Ursidae) (XP_026335864.1)        | IP <sub>3</sub> R3 Bear <i>Ursus arctos horribilis</i> (Carnivora: Ursidae) (XP_026338459.1)           |
| RyR Bee <i>Apis mellifera</i> (Hymenoptera: Apidae) (XP_006569098.1)                  | IP <sub>3</sub> R Bee <i>Bombus impatiens</i> (Hymenoptera: Apidae) (XP_024228402.1)                   |
| RyR Mosquito <i>Aedes aegypti</i> (Diptera: Culicidae) (XP_021707522.1)               | IP <sub>3</sub> R Mosquito <i>Aedes aegypti</i> (Diptera: Culicidae) (XP_021697927.1)                  |
| RyR Fruit fly <i>Drosophila melanogaster</i> (Diptera: Drosophilidae) (NP_476991.1)   | IP <sub>3</sub> R Fruit fly <i>Drosophila melanogaster</i> (Diptera: Drosophilidae) (NP_001287180.1)   |
| RyR Moth <i>Spodoptera exigua</i> (Lepidoptera: Noctuidae) (ALL55467.1)               | IP <sub>3</sub> R Moth <i>Manduca sexta</i> (Lepidoptera: Sphingidae) (XP_037294730.1)                 |
| RyR Silkworm <i>Bombyx mori</i> (Lepidoptera: Bombycidae) (XP_012544766.2)            | IP <sub>3</sub> R Silkworm <i>Bombyx mori</i> (Lepidoptera: Bombycidae) (XP_037876701.1)               |
| RyR Spider <i>Stegodyphus dumicola</i> (Araneae: Eresidae) (XP_035212318.1)           | IP <sub>3</sub> R Spider <i>Stegodyphus dumicola</i> (Araneae: Eresidae) (XP_035209639.1)              |
| RyR Planthopper <i>Laodelphax striatellus</i> (Hemiptera: Delphacidae) (AFK84959.1)   | IP <sub>3</sub> R Planthopper <i>Nilaparvata lugens</i> (Hemiptera: Delphacidae) (XP_039297802.1)      |
| RyR Termite <i>Cryptotermes secundus</i> (Blattodea: Kalotermitidae) (XP_023711458.1) | IP <sub>3</sub> R Termite <i>Zootermopsis nevadensis</i> (Isoptera: Archotermopsidae) (XP_021924143.1) |
